# Supplementary material for: Dangshen Erling Decoction Ameliorates Myocardial Hypertrophy via Inhibiting Myocardial Inflammation
Source: PubMed Central journal article supplement (PMC8762257; doi:10.3389/fphar.2021.725186), 2022-01-03
Supplement: Image1.pdf [file Image1.pdf]

## Supplementary Material

### Supplementary Figure

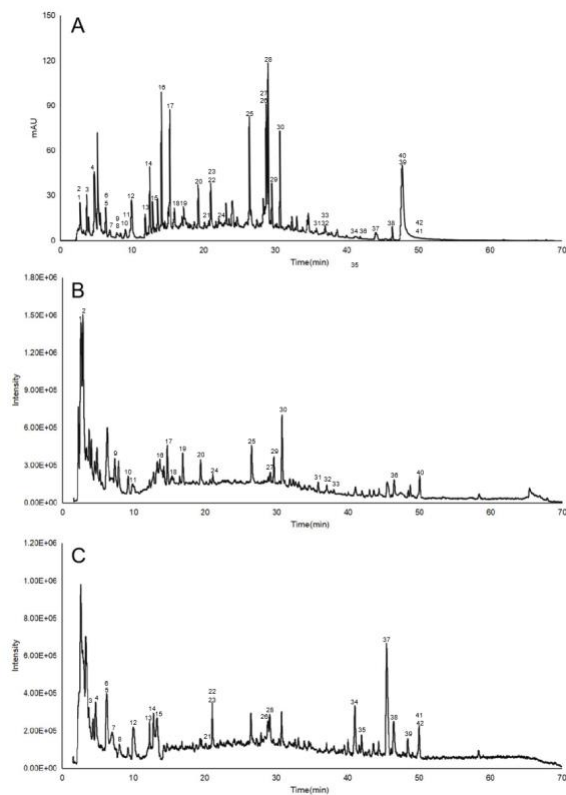

**Supplementary Figure 1.** Total ion chromatogram (TIC) (A) in positive mode (B) and negative mode (C) of DSEL.
